# Supplementary material for: SF6 abatement in a packed bed plasma reactor: study towards the effect of O2 concentration
Source: Royal Society of Chemistry journal article supplement (doi:10.1039/c9ra05629g), 2019-01-01
Supplement: c9ra05629g1.pdf [file c9ra05629g1.pdf]

## APPENDIX

### SF<sub>6</sub> DREs under different gas composition (110W, 150mL/min)

| O <sub>2</sub> concentration | SF <sub>6</sub> concentration |        |                   |        |                   |        |                   |        |                    |        |
|------------------------------|-------------------------------|--------|-------------------|--------|-------------------|--------|-------------------|--------|--------------------|--------|
|                              | 2%SF <sub>6</sub>             |        | 4%SF <sub>6</sub> |        | 6%SF <sub>6</sub> |        | 8%SF <sub>6</sub> |        | 10%SF <sub>6</sub> |        |
| No O <sub>2</sub> group      | 95.60%                        | 89.40% | 86.34%            | 90.72% | 71.48%            | 85.30% | 64.85%            | 51.87% | 22.35%             | 16.51% |
| 1%O <sub>2</sub>             | 94.56%                        | 91.40% | 88.53%            | 91.79% | 75.61%            | 87.73% | 53.64%            | 62.82% | 48.32%             | 60.12% |
| 2%O <sub>2</sub>             | 96.67%                        | 90.17% | 88.44%            | 90.60% | 81.98%            | 90.86% | 70.58%            | 91.30% | 65.66%             | 76.34% |
| 4%O <sub>2</sub>             | 90.35%                        | 92.83% | 82.57%            | 90.37% | 75.21%            | 85.97% | 78.24%            | 68.94% | 62.89%             | 66.71% |
| 6%O <sub>2</sub>             | 85.48%                        | 94.76% | 79.26%            | 81.60% | 67.45%            | 77.29% | 44.85%            | 50.37% | 29.86%             | 21.24% |
| 8%O <sub>2</sub>             | 80.42%                        | 93.44% | 72.88%            | 76.04% | 53.45%            | 50.07% | 44.58%            | 54.88% | 25.32%             | 16.74% |

### EYs under different gas composition (110W, 150mL/min)

| O <sub>2</sub> concentration | SF <sub>6</sub> concentration |         |                   |         |                   |         |                   |         |                    |         |
|------------------------------|-------------------------------|---------|-------------------|---------|-------------------|---------|-------------------|---------|--------------------|---------|
|                              | 2%SF <sub>6</sub>             |         | 4%SF <sub>6</sub> |         | 6%SF <sub>6</sub> |         | 8%SF <sub>6</sub> |         | 10%SF <sub>6</sub> |         |
| No O <sub>2</sub> group      | 10.0944                       | 9.4397  | 18.2333           | 19.1582 | 22.6427           | 27.0205 | 27.3900           | 21.9078 | 11.7997            | 8.7165  |
| 1%O <sub>2</sub>             | 9.9846                        | 9.6509  | 18.6958           | 19.3842 | 23.9510           | 27.7902 | 22.6554           | 26.5327 | 25.5105            | 31.7404 |
| 2%O <sub>2</sub>             | 10.2074                       | 9.5211  | 18.6768           | 19.1329 | 25.9688           | 28.7817 | 29.8102           | 38.5615 | 34.6652            | 40.3037 |
| 4%O <sub>2</sub>             | 9.5401                        | 9.8019  | 17.4371           | 19.0843 | 23.8243           | 27.2327 | 33.0454           | 29.1175 | 33.2028            | 35.2195 |
| 6%O <sub>2</sub>             | 9.0258                        | 10.0057 | 16.7381           | 17.2323 | 21.3661           | 24.4832 | 18.9428           | 21.2743 | 15.7646            | 11.2137 |
| 8%O <sub>2</sub>             | 8.4915                        | 9.8663  | 15.3908           | 16.0581 | 16.9314           | 15.8607 | 18.8288           | 23.1791 | 13.3677            | 8.8379  |

### Reaction formula and reaction heat of SF<sub>6</sub> degradation process

| No.  | Reaction                             | Reaction heat (kcal/mol) |
|------|--------------------------------------|--------------------------|
| (9)  | $e^* + O_2 \rightarrow O + O + e$    | 112.51                   |
| (10) | $e^* + O_2 \rightarrow O + O^-$      | 90.57                    |
| (11) | $e^* + O_2 \rightarrow O^+ + O + 2e$ | 324.53                   |
| (12) | $O^- \rightarrow O + e$              | 21.05                    |
| (13) | $SF_6 \rightarrow F + SF_5$          | 86.09                    |
| (14) | $SF_5 \rightarrow F + SF_4$          | 41.46                    |
| (15) | $SF_4 \rightarrow F + SF_3$          | 97.15                    |
| (16) | $SF_3 \rightarrow F + SF_2$          | 53.32                    |
| (17) | $SF_2 \rightarrow F + SF$            | 86.18                    |
| (18) | $SF \rightarrow F + S$               | 113.79                   |
| (19) | $SF_5 + O \rightarrow SOF_4 + F$     | - 42.53                  |
| (20) | $SF_4 + O \rightarrow SOF_4$         | - 126.63                 |
| (21) | $SF_3 + O \rightarrow SOF_2 + F$     | - 77.57                  |
| (22) | $SF_2 + O \rightarrow SOF_2$         | - 130.89                 |
| (23) | $SOF_4 + O \rightarrow SO_2F_2 + 2F$ | - 87.39                  |
| (24) | $SOF_2 + O \rightarrow SO_2F_2$      | - 39.03                  |
| (25) | $S + 2O \rightarrow SO_2$            | - 274.71                 |
| (26) | $SOF_2 + O \rightarrow SO_2 + 2F$    | - 68.33                  |
| (27) | $2F + O \rightarrow OF_2$            | -                        |
| (28) | $S_2F_{10} \rightarrow SF_4 + SF_6$  | -                        |
| (29) | $SiO_2 + 4F \rightarrow SiF_4 + 2O$  | -                        |
